# Supplementary material for: Serum Bilirubin Concentration is Associated with Left Ventricular Remodeling in Patients with Type 2 Diabetes Mellitus: A Cohort Study
Source: Springer Nature journal article supplement (doi:10.1007/s13300-018-0368-6), 2018-01-15
Supplement: MOESM1 [file 15365364]

Supplemental Table 1

Correlation between left ventricular geometry and medication status

| Variables                       | LVMI           | RWT   |
|---------------------------------|----------------|-------|
|                                 | <i>p</i> value |       |
| Diabetes treatment              |                |       |
| Sulfonylurea                    | 0.112          | 0.724 |
| Glinide                         | 0.468          | 0.396 |
| Biguanide                       | 0.565          | 0.555 |
| Thiazolidinedione               | 0.146          | 0.342 |
| $\alpha$ -glucosidase inhibitor | 0.948          | 0.972 |
| DPP-4 inhibitor                 | 0.447          | 0.534 |
| SGLT2 inhibitor                 | 0.168          | 0.735 |
| GLP-1 receptor analog           | 0.216          | 0.525 |
| Other treatment                 |                |       |
| ACE inhibitors                  | 0.077          | 0.821 |
| ARB                             | 0.281          | 0.588 |
| Statin                          | 0.230          | 0.510 |
| $\beta$ blocker                 | 0.338          | 0.840 |

*P* values were calculated using the Mann–Whitney U-test.

LVMI, left ventricular mass index; RWT, relative wall thickness; DPP-4, dipeptidyl peptidase-4; SGLT2, sodium glucose cotransporter 2; GLP-1, glucagon-like peptide-1;

ACE, angiotensin-converting enzyme; ARB, angiotensin II receptor blocker..
